# Supplementary material for: Biocontrol Potential of Bacteria Isolated from Vermicompost against Meloidogyne incognita on Tomato and Cucumber Crops
Source: MDPI journal article supplement (doi:10.3390/horticulturae10040407), 2024-04-17
Supplement: s1 [file s1]

## Supplementary material

### Tables

**Table S1**

Mortality of microorganism isolated from vermicompost to *Meloidogyne incognita* (24 h).

| Strain | Mortality (%) | Corrected mortality (%) |
|--------|---------------|-------------------------|
| YL1    | 97.33±0.67a   | 97.01±0.75a             |
| YL5    | 92.00±1.15a   | 91.04±1.29b             |
| YL6    | 96.00±1.15a   | 95.52±1.29ab            |
| YL17   | 94.00±2.31a   | 93.28±2.59ab            |
| YL31   | 95.33±1.76a   | 94.78±1.97ab            |
| EF43   | 92.67±1.76a   | 91.76±1.97ab            |
| CK     | 10.67±2.91b   | -                       |

The data in the table are mean ± standard deviation. Different letters in the same column indicate significant difference at P<0.05 level by Duncan's test.

**Table S2**

Inhibitory effects of antagonistic microorganism on *Meloidogyne incognita* associated with different dilution factors.

| Time | Strain | Two-fold dilution(2X) |                         | Three-fold dilution(3X) |                         | Five-fold dilution(5X) |                         |
|------|--------|-----------------------|-------------------------|-------------------------|-------------------------|------------------------|-------------------------|
|      |        | Mortality (%)         | Corrected mortality (%) | Mortality (%)           | Corrected mortality (%) | Mortality (%)          | Corrected mortality (%) |
| 24h  | YL1    | 92.00±1.15a           | 91.18±1.27c             | 90.67±1.76a             | 89.78±3.35a             | 83.33±1.76a            | 82.27±3.25d             |
|      | YL5    | 82.00±3.06c           | 80.15±3.37a             | 75.33±2.40b             | 72.99±4.56b             | 46.00±1.15d            | 42.55±2.13a             |
|      | YL6    | 90.00±1.15abc         | 88.97±1.23bc            | 88.00±2.00a             | 86.86±3.79a             | 80.00±2.00a            | 78.73±3.68d             |
|      | YL17   | 85.33±2.67abc         | 83.83±2.94abc           | 80.67±2.41b             | 78.83±4.56b             | 72.67±2.40b            | 70.92±4.43b             |
|      | YL31   | 89.33±0.67ab          | 88.24±0.74c             | 86.67±1.76a             | 85.40±3.35a             | 78.67±1.76ab           | 77.31±3.25cd            |
|      | EF43   | 83.33±1.76bc          | 81.62±1.95ab            | 79.33±0.67b             | 77.37±1.26b             | 56.00±3.46c            | 53.19±6.38c             |
|      | CK     | 9.33±4.37d            | -                       | 8.67±1.76c              | -                       | 6.00±0.00e             | -                       |
| 48h  | YL1    | 97.33±1.33a           | 96.87±1.56a             | 94.00±1.15a             | 93.08±2.31b             | 86.00±1.15a            | 84.56±2.21c             |
|      | YL5    | 88.67±2.91b           | 86.72±3.41b             | 81.33±1.76c             | 78.46±3.52a             | 60.00±1.15c            | 55.90±2.21a             |
|      | YL6    | 95.33±1.33ab          | 94.53±1.26ab            | 92.00±1.15a             | 90.77±2.31b             | 85.33±1.76a            | 83.83±3.37c             |
|      | YL17   | 90.67±2.91ab          | 89.06±3.41ab            | 86.00±2.31bc            | 83.85±4.62a             | 77.33±1.76b            | 75.01±1.96b             |
|      | YL31   | 92.67±1.33ab          | 91.41±1.56c             | 91.33±1.33ab            | 90.00±2.67b             | 83.33±1.33a            | 81.62±2.55c             |
|      | EF43   | 90.00±2.00ab          | 88.28±2.34ab            | 82.00±2.00c             | 79.23±4.00a             | 64.67±2.91c            | 61.04±5.55a             |
|      | CK     | 14.67±3.71c           | -                       | 13.33±2.40d             | -                       | 9.33±0.67d             | -                       |

The data in the table are mean ± standard deviation. Different letters in the same column indicate significant difference at P<0.05 level by Duncan's test.

## Figures

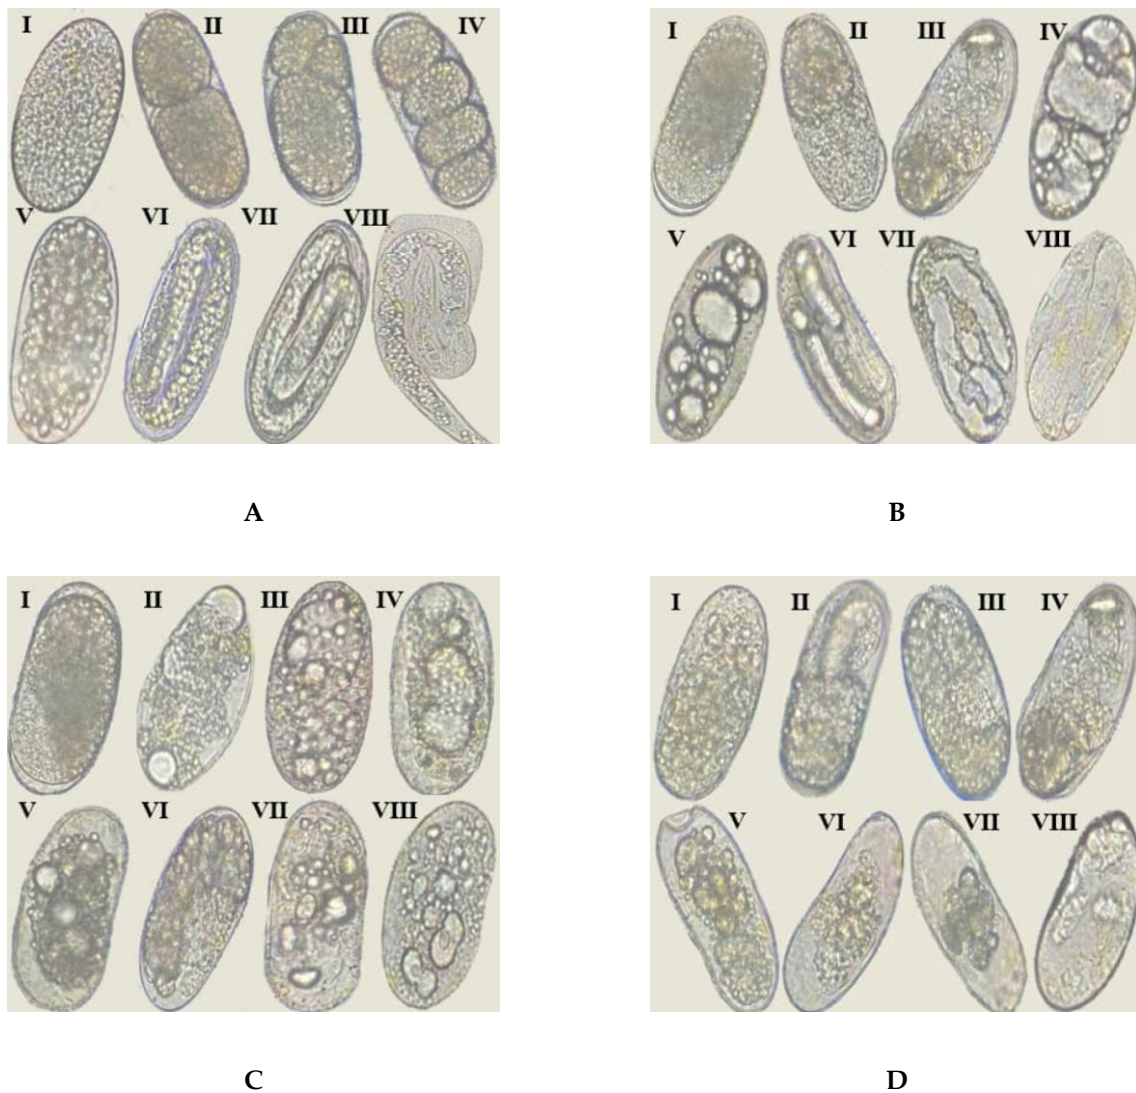

**Figure S1.** Effects of antagonistic bacteria on various development stages of root-knot nematode eggs (A : Normal root-knot nematode egg development; B, C, D:The development of root-knot egg treated by strains YL1, YL6 and YL31, respectively; I -VIII:Single-cell stage, twin-cell stage, triple-cell stage, four-cell stage, blastula stage, gastrula stage, first-instar larval stage, and second-instar larval stage, respectively). YL1, YL6 and YL31 represent three antagonistic bacteria against root-knot nematodes isolated from vermicompost.

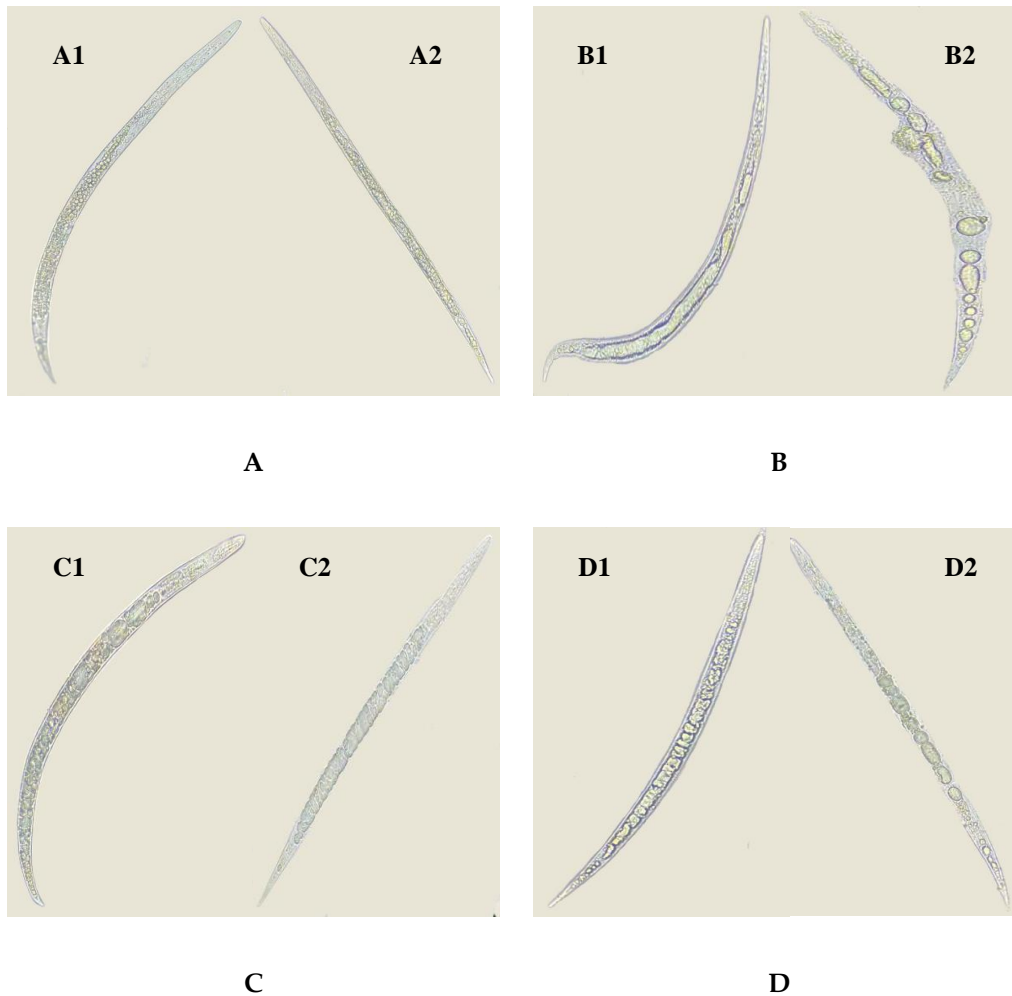

**Figure S2.** Effects of antagonistic bacteria on J2. A-D: the fermentation broths of the control and strains YL1, YL6 and YL31, respectively; 1 indicates the 12 h treatment, and 2 indicates the 24 h treatment). YL1, YL6 and YL31 represent three antagonistic bacteria against root-knot nematodes isolated from vermicompost.

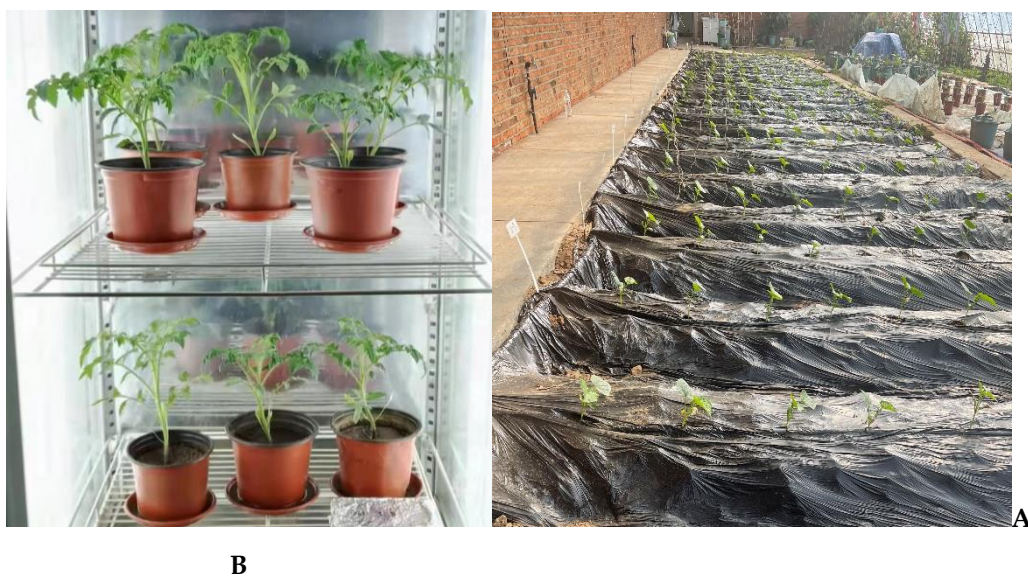

**Figure S3.** Pictures of tomato pot experiment (A) and cucumber field experiment(B).
